# Supplementary material for: A photovoltaic self-powered gas sensor based on a single-walled carbon nanotube/Si heterojunction
Source: Royal Society of Chemistry journal article supplement (doi:10.1039/c7nr02590d), 2017-01-01
Supplement: c7nr02590d1.pdf [file c7nr02590d1.pdf]

Electronic Supplementary Information for

**Photovoltaic Self-powered Gas Sensor based on Single-walled Carbon Nanotubes/Si Heterojunction**

L. Liu<sup>a,b</sup>, G. H. Li<sup>c</sup>, Y. Wang<sup>d,e</sup>, Y. Y. Wang<sup>b</sup>, T. Zhang<sup>\*,a</sup>, S. J. Qin<sup>\*,b</sup>

*i*-Lab, Suzhou Institute of Nano-tech and Nano-bionics, Chinese Academy of Sciences, Suzhou, 215123, China

Department of Environmental Science Xi'an Jiaotong-Liverpool University 111 Ren'ai Road, Suzhou 215123, China

C&N Intl. Co. Ltd Beijing 102206, China

Fig.S1 is the schematic fabrication procedure of the self-powered gas sensor based on SWNTs/Si. First lithography mask with different patterns were designed and an n-type Si wafer with a layer of 300 nm SiO<sub>2</sub> was patterned to expose Si surface (five identical effective sensing area 5\*100 μm\*500 μm and one area for sputtering electrode 400 μm\*400 μm) via photolithography and reactive ion etching (RIE). Second, patterned Ti/Au electrodes (~20 nm Ti and ~150 nm Au) were fabricated by photolithography and sputtering processes. After fabricating the microchip, SWNTs (Sigma Inc.) were purified by annealing under 300 °C for 2 h in a tube furnace and then treated with concentrated HCl and 30 % H<sub>2</sub>O<sub>2</sub> with volume ratio 3:1 at 60 °C for 6 h. The purified SWNTs were dispersed in dimethylformamide (DMF) via sonication for 4 h to form homogenous SWNTs dispersion (0.01 mg/ml). The as-prepared SWNTs dispersion was then drop-casted onto the prefabricated sensor chip to form a SWNT network. To remove the solvent left on SWNT network and reduce the contact resistance between SWNTs and the Ti/Au electrodes, the prepared devices were annealed in a tube furnace under pure Ar gas at 300 °C for 20 minutes.

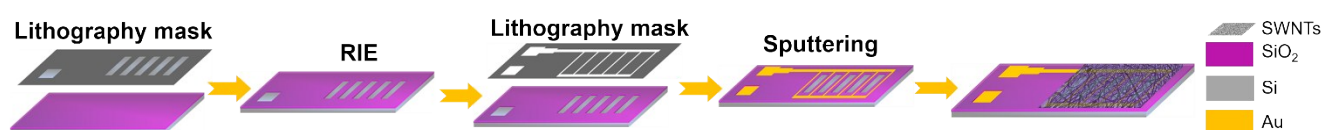

Fig.S1 The schematic fabrication process of gas sensor

Fig.S2b is the SEM image of the SWNT film which is covered on the Si and SiO<sub>2</sub> surface. As the thickness of SiO<sub>2</sub> layer is 300 nm, there is an obvious ledge at the interface of Si and SiO<sub>2</sub> layer and mesh-like SWNT film is worked as a bridge to connect Si and SiO<sub>2</sub>. Fig.S2a,c are the EDX results of two different locations (Si/SWNTs and Si/SiO<sub>2</sub>/SWNTs). The contents of C atom in both locations are very low which can indicate that the SWNT film is very thin. By comparison, the percentage of O atom increases from 0% to 19.51% owing to the existing of SiO<sub>2</sub> layer.

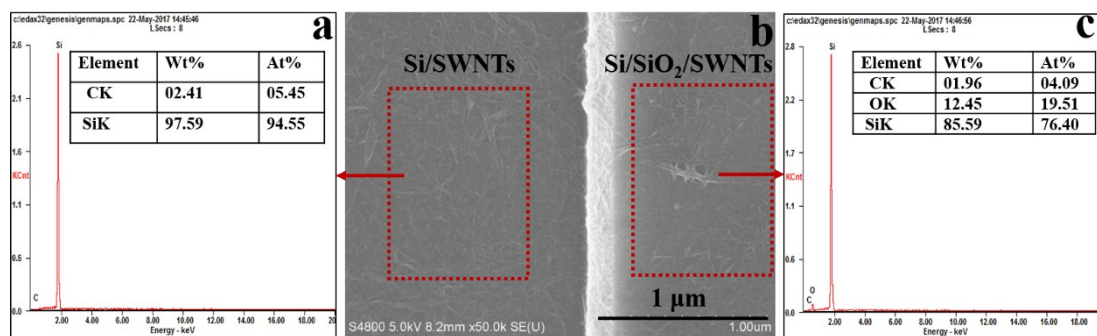

Fig.S2 a.c The EDX results of sensor at different locations; b The SEM image of the sensor at specific.

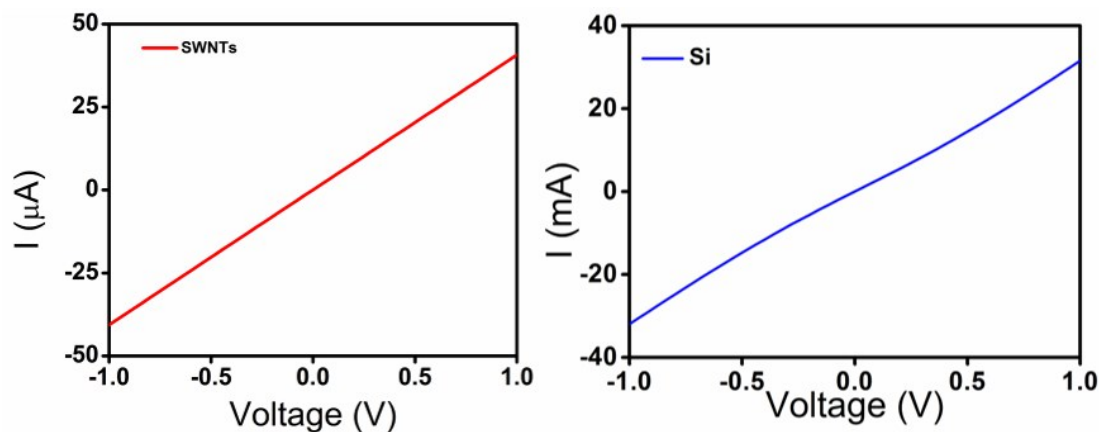

Fig. S3 (a) The Current-Voltage (I-V) curves of SWNTs-only device after annealed treatment. (b) The Current-Voltage (I-V) curves of n-Si-only device.

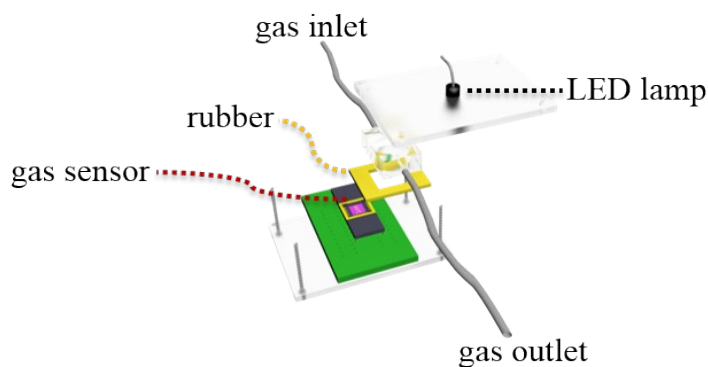

Fig. S4 The schematic graph of gas sensor testing process, all parts of the testing system are vertically placed.

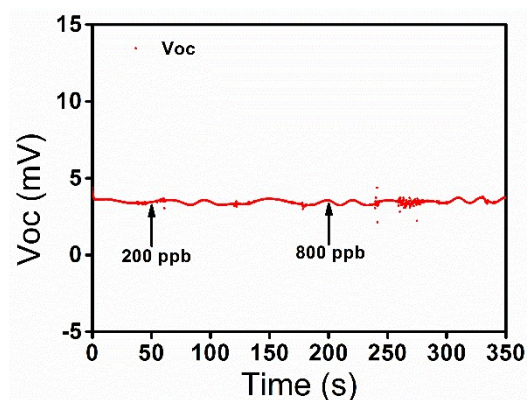

Fig. S5 The response of photovoltaic self-powered gas sensor under dark state.

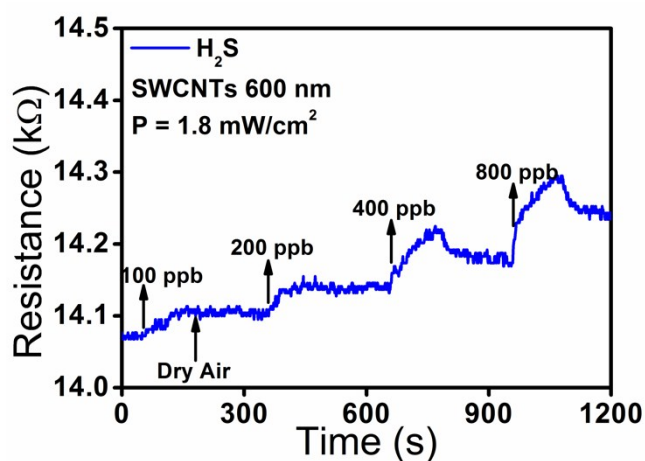

Fig. S6 The dynamic response of conventional SWCNTs-only device to different  $\text{H}_2\text{S}$  concentration ( $V_{ds} = 2 \text{ V}$ ,  $\lambda = 600 \text{ nm}$ ,  $P = 1.8 \text{ mW/cm}^2$ ).

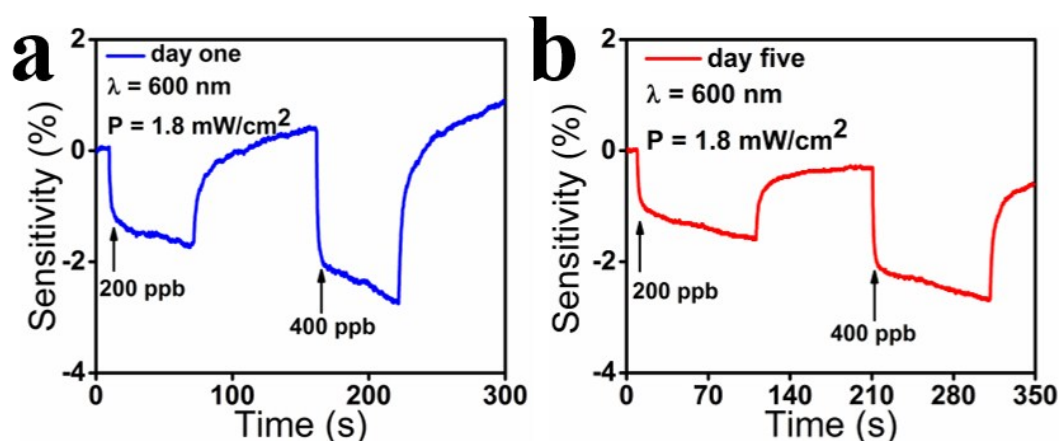

Fig. S7 The dynamic response of sensor to different concentration of  $\text{H}_2\text{S}$  at day one (a), and after five days (b) ( $\lambda = 600 \text{ nm}$ ,  $P = 1.8 \text{ mW/cm}^2$ ).
